## Correction

# Correction: The Multitentaculate Cirratulidae of the Genera *Cirriformia* and *Timarete* (Annelida: Polychaeta) from Shallow Waters of Brazil

The PLOS ONE Staff

## Notice of Republication

This article was republished on November 21st, 2014, due to multiple figures being posted incorrectly. The publisher apologizes for this error. Please download this article again to view the corrected version. The originally published, uncorrected article and the republished, corrected article are provided here for reference.

## Supporting Information

**File S1.** Originally published, uncorrected article (PDF)

**File S2.** Republished, corrected article (PDF)

## Reference

1. Magalhães WF, Seixas VC, Paiva PC, Elias R (2014) The Multitentaculate Cirratulidae of the Genera *Cirriformia* and *Timarete* (Annelida: Polychaeta) from Shallow Waters of Brazil. PLoS ONE 9(11): e112727. doi:10.1371/journal.pone.0112727

---

**Citation:** The PLOS ONE Staff (2014) Correction: The Multitentaculate Cirratulidae of the Genera *Cirriformia* and *Timarete* (Annelida: Polychaeta) from Shallow Waters of Brazil. PLoS ONE 9(12): e116130. doi:10.1371/journal.pone.0116130

**Published:** December 19, 2014

**Copyright:** © 2014 The PLOS ONE Staff. This is an open-access article distributed under the terms of the Creative Commons Attribution License, which permits unrestricted use, distribution, and reproduction in any medium, provided the original author and source are credited.
